# Supplementary material for: On the sulfide oxidation to sulfoxides using sodium orthovanadate in water
Source: Royal Society of Chemistry journal article supplement (doi:10.1039/d5cc01353d), 2025-01-01
Supplement: d5cc01353d1.pdf [file d5cc01353d1.pdf]

**Supporting Information**

**On the Sulfide Oxidation to Sulfoxides using Sodium Orthovanadate  
in Water**

Yunhan Zhang<sup>a†</sup>, Yiting Su<sup>a†</sup>, Lan Liu<sup>a,b</sup>, Bishuang Chen<sup>\*a,b</sup>

a. School of Marine Sciences, Sun Yat-Sen University, Zhuhai 519080.

b. Southern Marine Science and Engineering Guangdong Laboratory (Zhuhai),  
Zhuhai 519080, China..

† The two authors contributed equally to this work.

Corresponding Author:

Bishuang Chen: chenbsh23@mail.sysu.edu.cn / (+86) 0756-3668775

## Table of Contents

|                                                                                                                           |    |
|---------------------------------------------------------------------------------------------------------------------------|----|
| 1. Materials and methods .....                                                                                            | 3  |
| 1.1 Experimental procedures for sulfoxidation .....                                                                       | 3  |
| 1.2 Experimental procedure for investigation on effects of key parameters .....                                           | 3  |
| 1.3 Experimental procedure for isotope labelling .....                                                                    | 4  |
| 1.4 The enzymatic sulfoxidation by <i>CiVCPO</i> .....                                                                    | 4  |
| 1.4.1 The synthesized encoding gene of <i>CiVCPO</i> .....                                                                | 4  |
| 1.4.2 Gene synthesis and sub cloning .....                                                                                | 5  |
| 1.4.3 Expression and purification of <i>CiVCPO</i> .....                                                                  | 5  |
| 1.4.4 Sulfoxidation catalyzed by <i>CiVCPO</i> , thermally inactivated <i>CiVCPO</i> , and $\text{Na}_3\text{VO}_4$ ..... | 6  |
| 1.5 Time-course of substrate conversion and product formation .....                                                       | 7  |
| 1.6 GC analysis .....                                                                                                     | 7  |
| 1.6.1 GC method .....                                                                                                     | 7  |
| 1.6.2 The retention times of each compound .....                                                                          | 8  |
| 1.6.3 The product yield determination .....                                                                               | 9  |
| 1.7 HPLC analysis .....                                                                                                   | 10 |
| 1.7.1 The HPLC method .....                                                                                               | 10 |
| 1.7.2 The determination of the product yield by HPLC .....                                                                | 12 |
| 2. Supplementary Figures .....                                                                                            | 13 |
| 3. GC Chromatography .....                                                                                                | 14 |
| 4. HPLC Chromatography .....                                                                                              | 17 |

## 1. Materials and methods

All chemical raw materials used were purchased from commercial suppliers and were not subject to additional purification.

### 1.1 Experimental procedures for sulfoxidation

The sulfoxidation reaction was carried out according to the general procedure shown as below. The reaction was carried in 1 mL of PBS buffer containing substrate,  $\text{H}_2\text{O}_2$  and  $\text{Na}_3\text{VO}_4$ . The specific concentration (substrate concentration of **1a-1r**: 5mM, substrate concentration of **2a-2g**: 1mM) of each substrate was used, sodium orthovanadate was added in the amount of 10 mM, and hydrogen peroxide was added in double the amount of substrate. The reaction was carried out at 35°C for 6 h. At the completion of the reaction, the mixture was extracted with an equal volume of ethyl acetate, dried with  $\text{Na}_2\text{SO}_4$ , and then the sample was analyzed by GC or HPLC. All the experiments were performed in triplicate.

Notably, most organic sulfides exhibit limited solubility in aqueous media such as phosphate buffer. To address this issue and ensure homogeneous reaction conditions, we employed a DMSO pre-dissolution strategy. Specifically, a stock solution of the sulfide (100 mM) was first prepared in DMSO, which ensured complete dissolution of the hydrophobic substrate. Subsequently, 50  $\mu\text{L}$  of this DMSO solution was added to 950  $\mu\text{L}$  of phosphate buffer containing the appropriate concentrations of  $\text{Na}_3\text{VO}_4$  and  $\text{H}_2\text{O}_2$ , resulting in a final reaction mixture with: 5 mM sulfide, 5% v/v DMSO and PBS buffer (50 mM, pH 6.5).

### 1.2 Experimental procedure for investigation on effects of key parameters

The reaction set-up for the investigation on effects of key parameters was the same as used to perform the sulfoxidation reaction with temperature, pH, hydrogen peroxide concentration and substrate concentration changes within the given ranges.

### 1.3 Experimental procedure for isotope labelling

The oxygen origin in the reaction was investigated using  $^{18}\text{O}$ -labeled  $\text{H}_2\text{O}_2$ . Specifically, 1 mL reaction system containing 10 mM  $\text{Na}_3\text{VO}_4$ , 5 mM methyl phenyl sulfide, and 10 mM  $^{18}\text{O}$ - $\text{H}_2\text{O}_2$  was incubated in a shaker (35 °C, 700 rpm) for 6 h. After the reaction, the mixture was extracted with an equal volume of ethyl acetate. The organic layer was dried over anhydrous  $\text{Na}_2\text{SO}_4$  and subsequently analyzed by gas chromatography-mass spectrometry (GC-MS).

### 1.4 The enzymatic sulfoxidation by *CiVCPO*

#### 1.4.1 The synthesized encoding gene of *CiVCPO*

```
ATGGGCAGCGTGACCCCCATCCCCCTGCCAAGATCGACGAGCCCGAGGAGTACAACACC
AACTACATCCTGTTCTGGAACCACGTGGGCCTGGAGCTGAACAGGGTGACCCACACCGTG
GGCGGCCCCCTGACCGGCCCCCCCCCTGAGCGCCAGGGCCCTGGGCATGCTGCACCTGGCC
ATCCACGACGCCTACTTCAGCATCTGCCCCCCCACCGACTTCACCACCTTCCTGAGCCCC
GACACCGAGAACGCCGCCTACAGGCTGCCAGCCCCAACGGCGCCAACGACGCCAGGCAG
GCCGTGGCCGGCGCCGCCCTGAAGATGCTGAGCAGCCTGTACATGAAGCCCGTGGAGCAG
CCCAACCCCAACCCCGGCGCCAACATCAGCGACAACGCCTACGCCAGCTGGGCCTGGTG
CTGGACAGGAGCGTGCTGGAGGCCCCCGGCGGCGTGGACAGGGAGAGCGCCAGCTTCATG
TTCGGCGAGGACGTGGCCGACGTGTTCTTCGCCCTGCTGAACGACCCCAGGGGCGCCAGC
CAGGAGGGCTACCACCCACCCCCGGCAGGTACAAGTTCGACGACGAGCCCACCCACCCC
GTGGTGCTGATCCCCGTGGACCCCAACAACCCCAACGGCCCCAAGATGCCCTTCAGGCAG
TACCACGCCCCCTTCTACGGCAAGACCACCAAGAGGTTCCGCCACCCAGAGCGAGCACTTC
CTGGCCGACCCCCCGGCCTGAGGAGCAACGCCGACGAGACCGCCGAGTACGACGACGCC
GTGAGGGTGGCCATCGCCATGGGCGGCGCCAGGCCCTGAACAGCACCAAGAGGAGCCCC
TGGCAGACCGCCCAGGGCCTGTACTGGGCCTACGACGGCAGCAACCTGATCGGCACCCCC
CCCAGGTTCTACAACCAGATCGTGAGGAGGATCGCCGTGACCTACAAGAAGGAGGAGGAC
CTGGCCAACAGCGAGGTGAACAACGCCGACTTCGCCAGGCTGTTCCGCCCTGGTGGACGTG
GCCTGCACCGACGCCGGCATCTTCAGCTGGAAGGAGAAGTGGGAGTTCGAGTTCTGGAGG
CCCCTGAGCGGCGTGAGGGACGACGGCAGGCCCGACCACGGCGACCCCTTCTGGCTGACC
CTGGGCGCCCCCGCCACCAACACCAACGACATCCCCTTCAAGCCCCCTTCCCCGCCTAC
```

CCCAGCGGCCACGCCACCTTCGGCGGCGCCGTGTTCCAGATGGTGAGGAGGTACTACAAC  
GGCAGGGTGGGCACCTGGAAGGACGACGAGCCCGACAACATCGCCATCGACATGATGATC  
AGCGAGGAGCTGAACGGCGTGAACAGGGACCTGAGGCAGCCCTACGACCCACCGCCCC  
ATCGAGGACCAGCCCGGCATCGTGAGGACCAGGATCGTGAGGCACTTCGACAGCGCCTGG  
GAGCTGATGTTTCGAGAACGCCATCAGCAGGATCTTCCTGGGCGTGCACTGGAGGTTTCGAC  
GCCGCCGCCGCCAGGGACATCCTGATCCCCACCACCACCAAGGACGTGTACGCCGTGGAC  
AACAAACGGCGCCACCGTGTTCCAGAACGTGGAGGACATCAGGTACACCACCAGGGGCACC  
AGGGAGGACCCCGAGGGCCTGTTCCCATCGGCGGCGTGCCCCTGGGCATCGAGATCGCC  
GACGAGATCTTCAACAACGGCCTGAAGCCCACCCCCCGAGATCCAGCCCATGCCCCAG  
GAGACCCCGTGCAGAAGCCCGTGGGCCAGCAGCCCGTGAAGGGCATGTGGGAGGAGGAG  
CAGGCCCCCGTGGTGAAGGAGGCCCCC

#### 1.4.2 Gene synthesis and sub cloning

The *CiVCPO*-recombinant plasmids were constructed according to a previous procedure. The genes were codon-optimized for *E. coli*, synthesized, and synthesized and cloned in frame with the N-terminal His-tag of the expression vector pET28a(+) between the NdeI and HindIII restriction sites by Tsingke Biotechnology Co., Ltd. (Beijing, China).

#### 1.4.3 Expression and purification of *CiVCPO*

Single colonies of the recombinant strains were picked and then incubated in 5 mL of LB medium containing 50 µg/mL kanamycin at 37 °C and 200 rpm for 6 h. The seed broth was transferred to 250 mL of LB medium containing 50 µg/mL of kanamycin with a 2% inoculation dose and shaken at 37 °C and 200 rpm for 3 h. An amount of 0.5 mM of Isopropyl-β-D-thiogalactopyranoside (IPTG) was added to induce the protein expression. After induction at 18 °C for 16 h, the cells were harvested by centrifugation at 4 °C at 12,000× *g* for 20 min.

The harvested cells expressing enzymes were resuspended in binding buffer (20 mM sodium phosphate, a pH of 7.4, 500 mM of NaCl, 100 µM of sodium

orthovanadate, and 20 mM of imidazole), disrupted by ultrasonication in an ice bath, and followed by centrifugation at  $12,000\times g$  for 20 min to remove the cell debris. The resulting supernatant was loaded onto a Ni-NTA column (5 mL, Sangon Biotech, Shanghai, China) that was pre-equilibrated with buffer A (20 mM of sodium phosphate, a pH of 7.4, 500 mM of NaCl, and 20 mM of imidazole). After washing with washing buffer (20 mM of sodium phosphate, a pH of 7.4, 500 mM of NaCl, and 50 mM of imidazole), the target protein was eluted with elution buffer (20 mM of sodium phosphate, a pH of 7.4, 500 mM of NaCl, and 250 mM of imidazole). The crude extract was concentrated by an ultrafiltration centrifuge tube (Merck Millipore, 30 kDa ) and then stored at  $-20\text{ }^{\circ}\text{C}$  for subsequent analysis.

#### **1.4.4 Sulfoxidation catalyzed by *CiVCPO*, thermally inactivated *CiVCPO*, and $\text{Na}_3\text{VO}_4$**

In a 1 mL reaction system, the substrate sulfide concentration was 5 mM and double the amount of hydrogen peroxide added to the substrate, 1  $\mu\text{M}$  *CiVCPO* was added, and the reaction was carried out in PBS (50 mM, pH 6.0) buffer for 6 h. At the end of the reaction, the mixture was extracted with an equal volume of ethyl acetate, and the mixture was dried with  $\text{Na}_2\text{SO}_4$ , and the samples were analyzed using a gas chromatograph. The reaction system for the thermally inactivate *CiVCPO* is the same as above, with the addition of 1  $\mu\text{M}$  *CiVCPO* inactivated at  $99\text{ }^{\circ}\text{C}$  for an hour as the biocatalyst. The reaction system for  $\text{Na}_3\text{VO}_4$  is the same as above, with no enzyme adding to the reaction system but the addition of 10 mM sodium orthovanadate. All the reactions were incubated in a shaker ( $35\text{ }^{\circ}\text{C}$ , 700 rpm) for 6 h. After the reaction, the mixture was extracted with an equal volume of ethyl acetate. The organic layer was dried over anhydrous  $\text{Na}_2\text{SO}_4$  and subsequently analyzed by gas chromatography-mass spectrometry (GC-MS).

### 1.5 Time-course of substrate conversion and product formation

In 1 mL reaction volumes, the substrate methyl phenyl sulfide was added at a concentration of 5 mM, 10 mM Na<sub>3</sub>VO<sub>4</sub> was added, and hydrogen peroxide was added in double the amount of the substrate. The reaction was carried out at 35°C for 8 h. Samples were taken at hourly intervals, the mixture was extracted with an equal volume of ethyl acetate, dried with Na<sub>2</sub>SO<sub>4</sub> and the samples were analyzed by gas chromatography.

### 1.6 GC analysis

#### 1.6.1 GC method

(1) The yield of sulfoxides (**1a-1f**, **1n**) generated from the corresponding sulfides were analyzed using gas chromatography with a Scion GC 456 system equipped with an Agilent J&W DB-1 GC column (60 m × 0.53 mm × 2.5 μm) and nitrogen as the carrier gas. The specific method was as follows (Table S1).

**Table S1.GC Temperature Program**

| Heating Rate<br>(°C/min) | Column Temperature<br>(°C) | Hold Time<br>(min) |
|--------------------------|----------------------------|--------------------|
| initial                  | 110                        | 1.2                |
| 25                       | 150                        | 2                  |
| 30                       | 200                        | 0.5                |
| 30                       | 300                        | 0.5                |

(2) The yield of sulfoxides (**1g**, **1i**, **1m**, **1r**) generated from the corresponding sulfides were analyzed using gas chromatography with a Scion GC 456 system equipped with an Agilent J&W DB-1 GC column (60 m x 0.53 mm × 2.5 μm) and nitrogen as the carrier gas. The specific method was as follows (Table S2).

**Table S2.GC Temperature Program**

| Heating Rate<br>(°C/min) | Column Temperature<br>(°C) | Hold Time<br>(min) |
|--------------------------|----------------------------|--------------------|
|--------------------------|----------------------------|--------------------|

|         |     |     |
|---------|-----|-----|
| initial | 35  | 1.2 |
| 10      | 150 | 2   |
| 15      | 230 | 0.5 |
| 20      | 280 | 0.5 |

### 1.6.2 The retention times of each compound

The GC retention times were shown in Table S3.

**Table S3. GC retention times for selected compounds**

| entry     | compound                                                                            | retention time<br>(min) |
|-----------|-------------------------------------------------------------------------------------|-------------------------|
| <b>1a</b> | 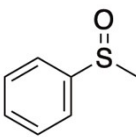  | 7.71                    |
| <b>1b</b> |  | 8.90                    |
| <b>1c</b> |  | 8.77                    |
| <b>1d</b> |  | 9.92                    |
| <b>1e</b> |  | 9.18                    |
| <b>1f</b> |  | 7.45                    |



|           |                                                                                   |       |
|-----------|-----------------------------------------------------------------------------------|-------|
| <b>1g</b> | 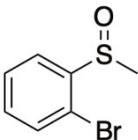 | 20.32 |
| <b>1i</b> |  | 20.80 |
| <b>1m</b> |  | 16.63 |
| <b>1n</b> |  | 5.58  |
| <b>1r</b> |  | 10.72 |

### 1.6.3 The product yield determination

Product linear regression equation and correlation coefficient were shown in Table S4.

**Table S4. Product linear regression equation and correlation coefficient**

| entry     | product regression equation | correlation coefficient |
|-----------|-----------------------------|-------------------------|
| <b>1a</b> | $y = 508.48x - 144.93$      | 0.9977                  |
| <b>1b</b> | $y = 265.74x - 398.57$      | 0.9975                  |
| <b>1c</b> | $y = 578.96x - 167.24$      | 0.9972                  |
| <b>1d</b> | $y = 714.15x - 169.39$      | 0.9989                  |
| <b>1e</b> | $y = 629.88x - 293.37$      | 0.9974                  |
| <b>1f</b> | $y = 462.75x - 110.07$      | 0.9995                  |
| <b>1g</b> | $y = 923.49x - 356.62$      | 0.9975                  |
| <b>1i</b> | $y = 434.8x - 199.7$        | 0.9976                  |
| <b>1m</b> | $y = 232.08x - 73.299$      | 0.9995                  |
| <b>1n</b> | $y = 153.88x - 13.815$      | 0.9983                  |

$$\text{yield}(\%) = (\text{Ca}/\text{C0}) \times 100\%$$

In the formula, Ca represents the molar amount of sulfoxide produced by the reaction for a certain period of time; C0 represents the molar amount of substrate added initially.

## 1.7 HPLC analysis

### 1.7.1 The HPLC method

The yield of sulfoxides (**1h**, **1j-1l**, **1o-1q**, **2a-2g**) generated from the corresponding sulfides were analyzed using HPLC. Detection conditions were given as follows: The Ultimate Cellu-D (Welch) HPLC column (250×4.6 mm, Chiral Technologies), temperature: 30 °C, flow rate: 1 mL/min, loading volume: 5 µl, mobile phase buffer A: hexane, buffer B: iso-propyl alcohol (IPA). The detailed analytical conditions and the retention times of each compound were shown in Table S5. (This column is a chiral stationary phase that can separate the enantiomers of some compounds, resulting in two distinct peaks on the chromatogram).

**Table S5. HPLC methods for analysis**

| entry     | compound                                                                            | program                      | retention time |
|-----------|-------------------------------------------------------------------------------------|------------------------------|----------------|
| <b>1h</b> | 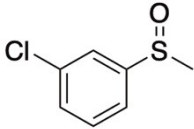 | Hexane 70%, IPA 30%<br>254nm | 7.883          |
| <b>1j</b> |  | Hexane 30%, IPA 70%<br>254nm | 9.709          |

|    |                                                                                     |                     |        |
|----|-------------------------------------------------------------------------------------|---------------------|--------|
| 1k | 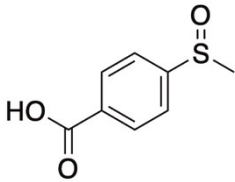   | Hexane 30%, IPA 70% |        |
|    |                                                                                     | 210nm               | 9.944  |
| 1l |    | Hexane 70%, IPA 30% |        |
|    |                                                                                     | 310nm               | 9.981  |
| 1o |    | Hexane 10%, IPA 90% | 10.045 |
|    |                                                                                     | 254nm               |        |
| 1p |   | Hexane 50%, IPA 50% | 20.283 |
|    |                                                                                     | 280nm               | 21.007 |
| 1q |  | Hexane 50%, IPA 50% | 24.421 |
|    |                                                                                     | 254nm               |        |
| 2a |  | Hexane 10%, IPA 90% | 12.613 |
|    |                                                                                     | 310nm               |        |
| 2b |  | Hexane 10%, IPA 90% | 8.942  |
|    |                                                                                     | 310nm               |        |
| 2c |  | Hexane 70%, IPA 30% | 11.772 |
|    |                                                                                     | 254nm               | 12.892 |

|    |                                                                                    |                     |        |
|----|------------------------------------------------------------------------------------|---------------------|--------|
| 2d | 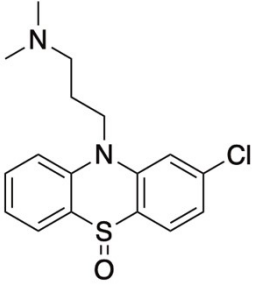  | Hexane 10%, IPA 90% |        |
|    |                                                                                    | 310nm               | 13.614 |
| 2e |   | Hexane 30%, IPA 70% |        |
|    |                                                                                    | 280nm               | 12.114 |
| 2f |   | Hexane 50%, IPA 50% |        |
|    |                                                                                    | 310nm               | 16.109 |
| 2g |  | Hexane 70%, IPA 30% |        |
|    |                                                                                    | 254nm               | 24.421 |

### 1.7.2 The determination of the product yield by HPLC

Product linear regression equation and correlation coefficient were shown in Table S6.

**Table S6. Product linear regression equation and correlation coefficient**

| entry | product regression equation | correlation coefficient |
|-------|-----------------------------|-------------------------|
| 1h    | $y = 844.16x - 874.66$      | 0.9939                  |
| 1j    | $y = 2729.6x - 112.23$      | 0.9996                  |
| 1k    | $y = 431.43x - 52.46$       | 0.9988                  |
| 1l    | $y = 51x - 2.9333$          | 0.9979                  |
| 1o    | $y = 4373.8x + 1542.$       | 0.9994                  |
| 1p    | $y = 1034.6x - 68.681$      | 0.9990                  |
| 1q    | $y = 4540.2x - 4600.7$      | 0.9979                  |

|           |                        |        |
|-----------|------------------------|--------|
| <b>2a</b> | $y = 3175.9x - 2479.2$ | 0.9995 |
| <b>2b</b> | $y = 5570.8x - 676.76$ | 0.9967 |
| <b>2c</b> | $y = 3602.3x - 1133.3$ | 0.9982 |
| <b>2d</b> | $y = 2231.9x - 347.8$  | 0.9941 |
| <b>2e</b> | $y = 3048.1x - 51.8$   | 0.9999 |
| <b>2f</b> | $y = 788.68x + 344$    | 0.9995 |
| <b>2g</b> | $y = 1803.2x + 501.98$ | 0.9944 |

$$\text{yield}(\%) = (\text{Ca}/\text{C0}) \times 100\%$$

In the formula, Ca represents the molar amount of sulfoxide produced by the reaction for a certain period of time; C0 represents the molar amount of substrate added initially.

## 2. Supplementary Figures

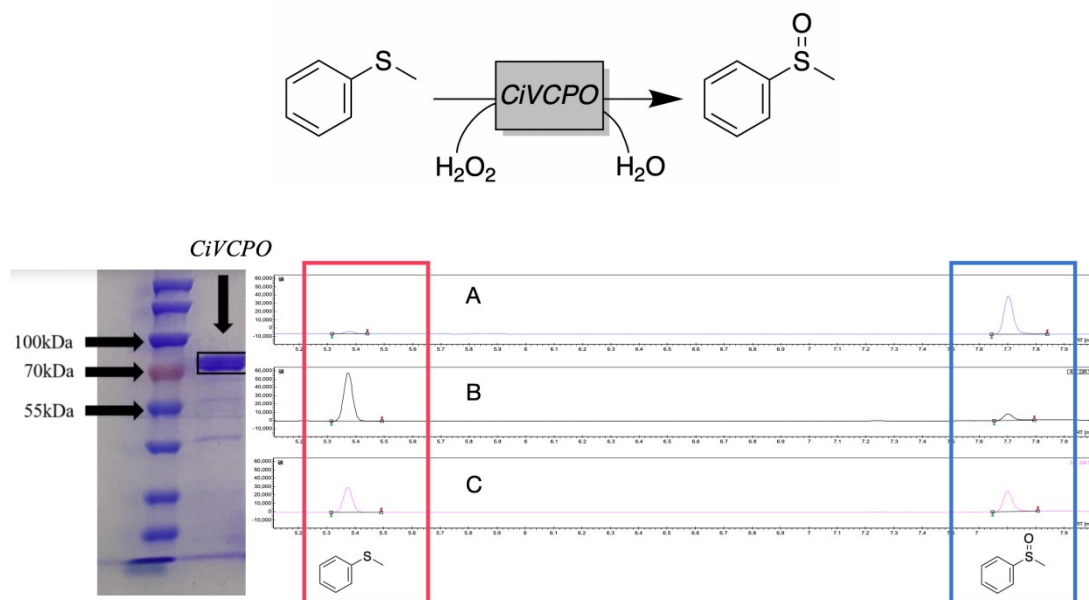

**Figure S1.** sulfoxidation catalyzed by *CiVCPO*, thermally inactivated *CiVCPO*, and  $\text{Na}_3\text{VO}_4$ . Left: SDS-PAGE of *CiVCPO*. Right: The GC chromatogram of sulfoxidation catalyzed by *CiVCPO* (A), thermally inactivated *CiVCPO* (B) and  $\text{Na}_3\text{VO}_4$  (C).

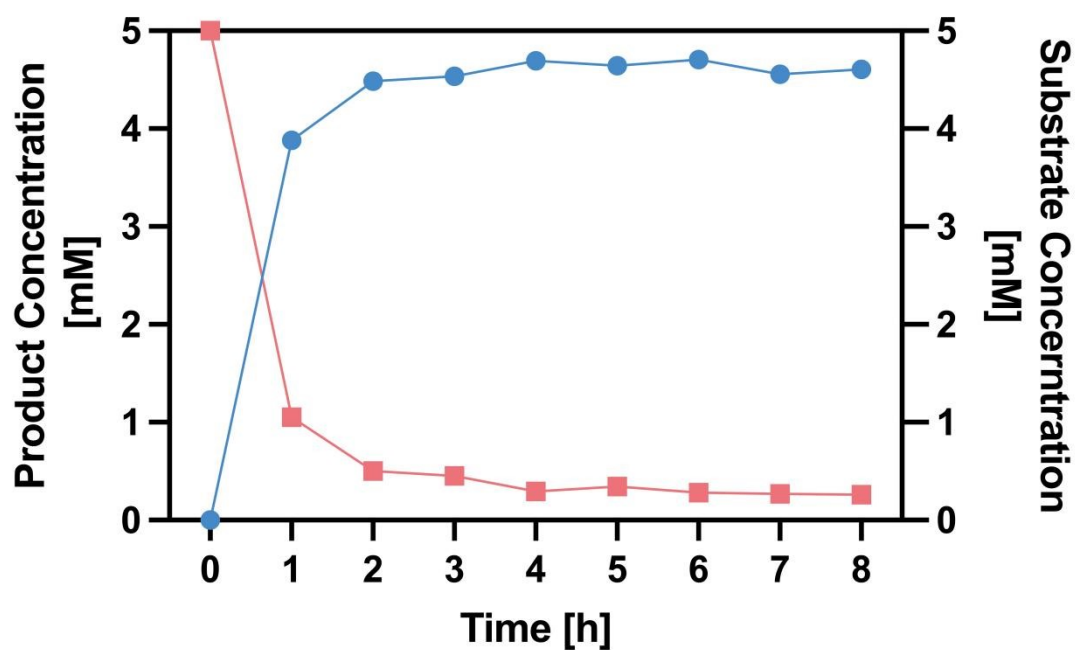

**Figure S2.** Time-course of substrate conversion and product formation.

### 3. GC Chromatography

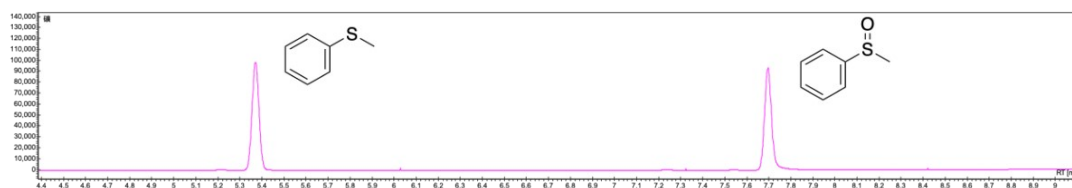

**Figure S3.** Representative GC chromatogram of **1a** and the corresponding substrate.

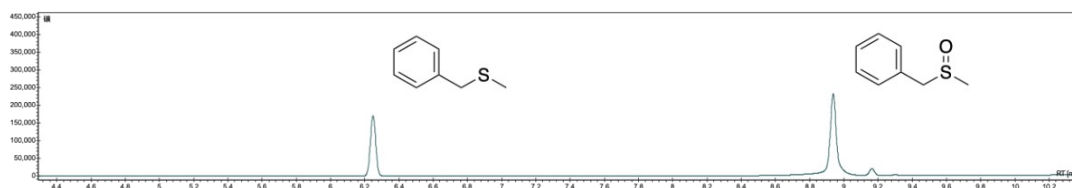

**Figure S4.** Representative GC chromatogram of **1b** and the corresponding substrate.

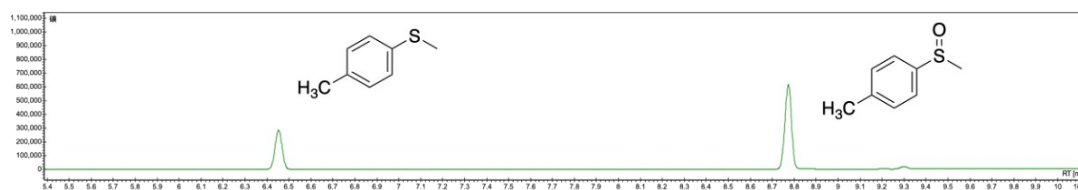

**Figure S5.** Representative GC chromatogram of **1c** and the corresponding substrate.

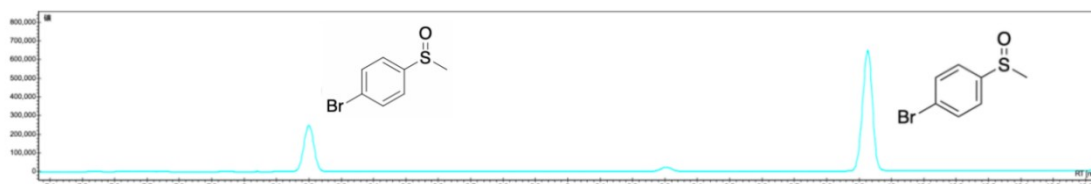

**Figure S6.** Representative GC chromatogram of **1d** and the corresponding substrate.

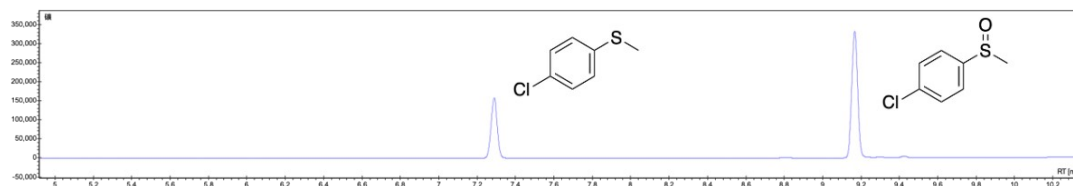

**Figure S7.** Representative GC chromatogram of **1e** and the corresponding substrate.

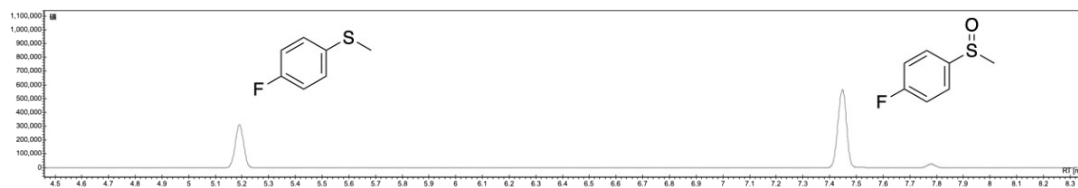

**Figure S8.** Representative GC chromatogram of **1f** and the corresponding substrate.

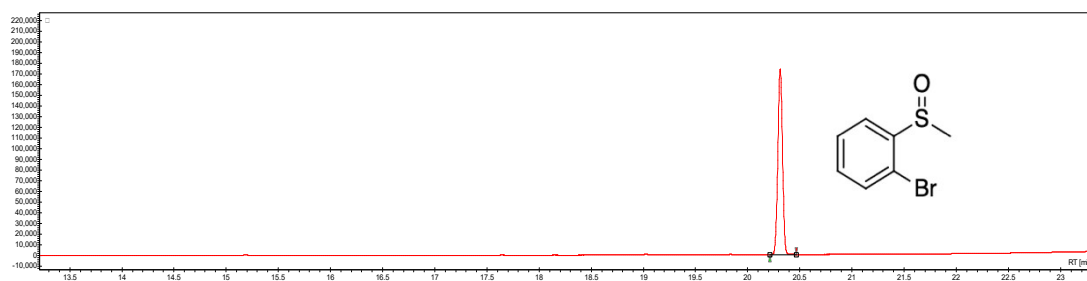

**Figure S9.** Representative GC chromatogram of **1g**.

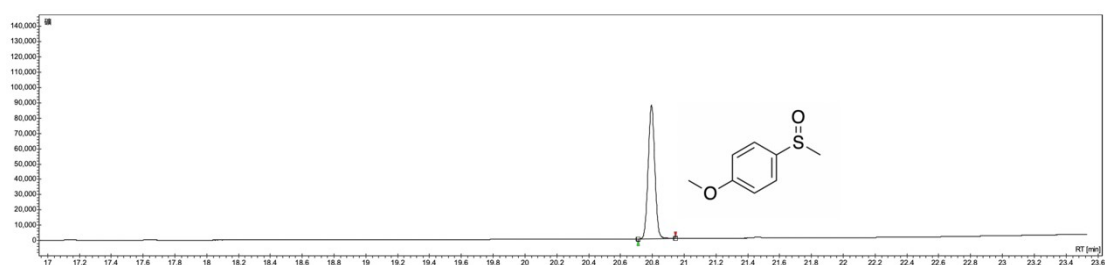

**Figure S10.** Representative GC chromatogram of **1i**.

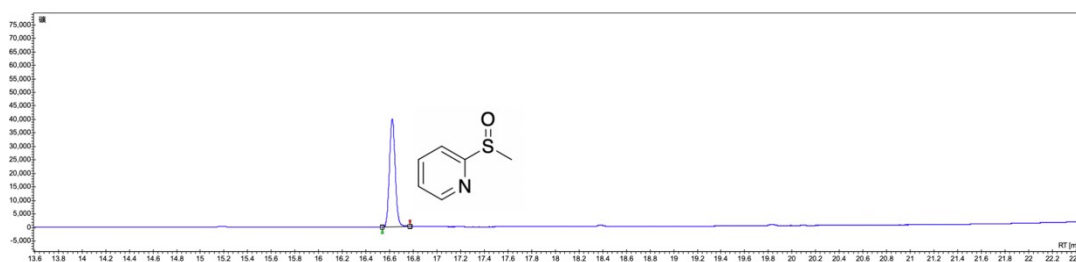

**Figure S11.** Representative GC chromatogram of **1m**.



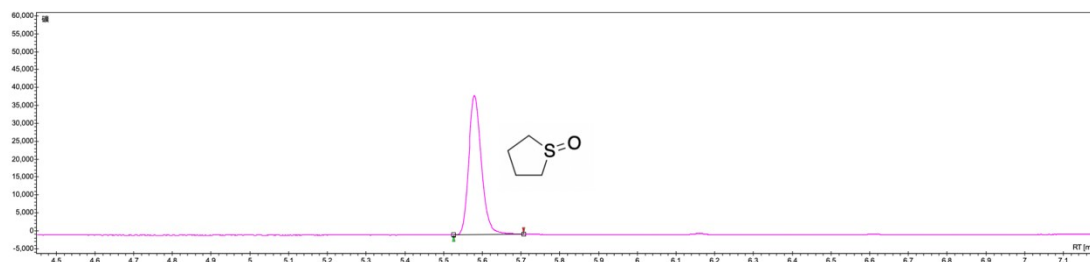

**Figure S12.** Representative GC chromatogram of **1n**.

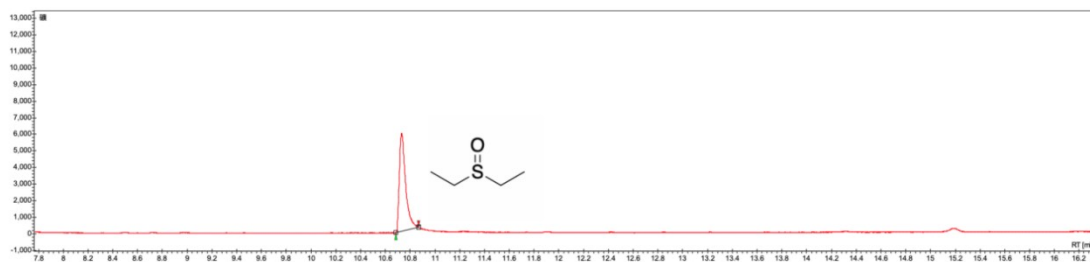

**Figure S13.** Representative GC chromatogram of **1r**.

#### 4. HPLC Chromatography

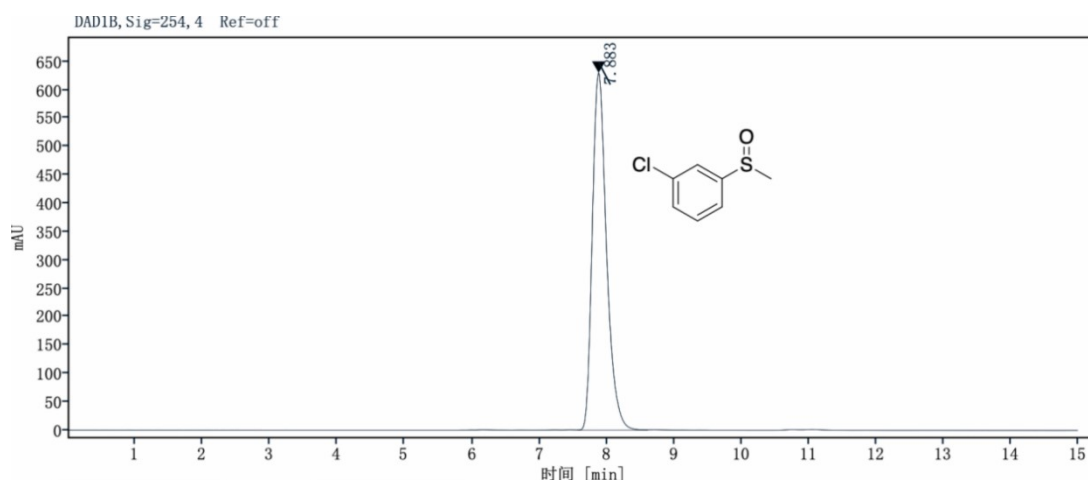

**Figure S14.** Representative chiral HPLC chromatogram of **1h**.

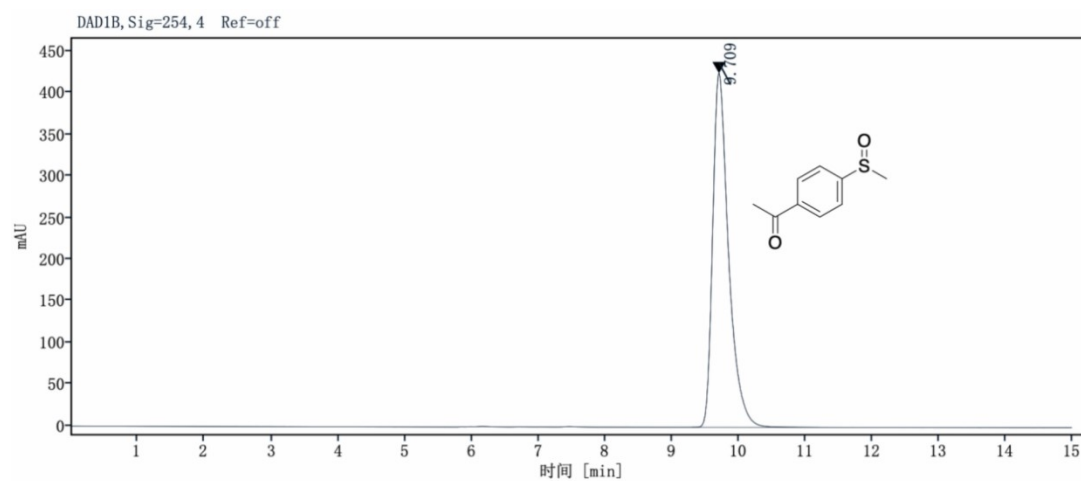

**Figure S15.** Representative chiral HPLC chromatogram of **1j**.

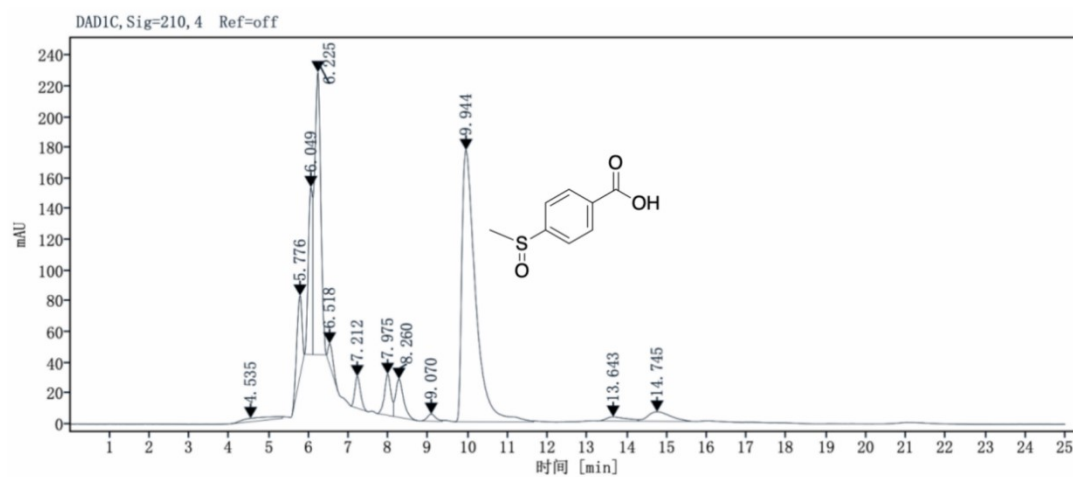

**Figure S16.** Representative chiral HPLC chromatogram of **1k**.

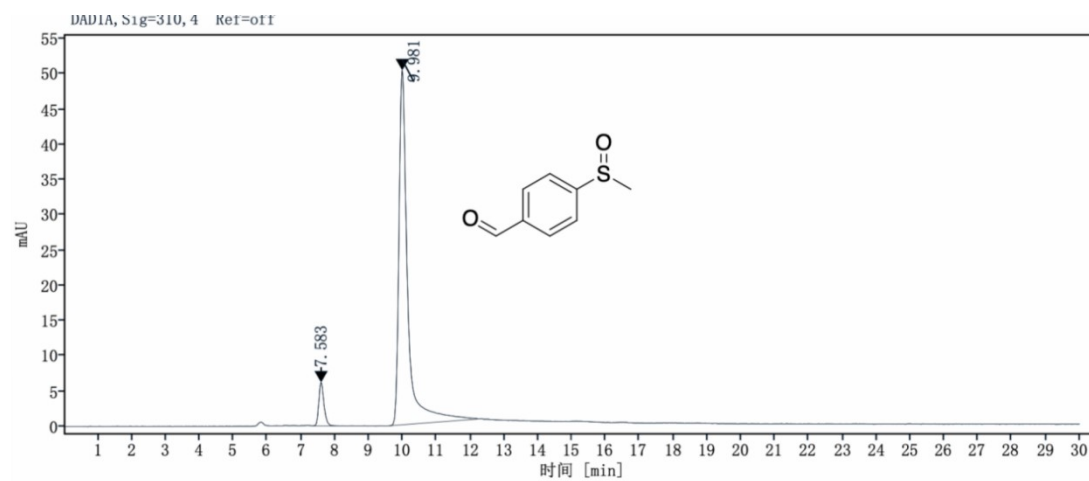

**Figure S17.** Representative chiral HPLC chromatogram of **11**

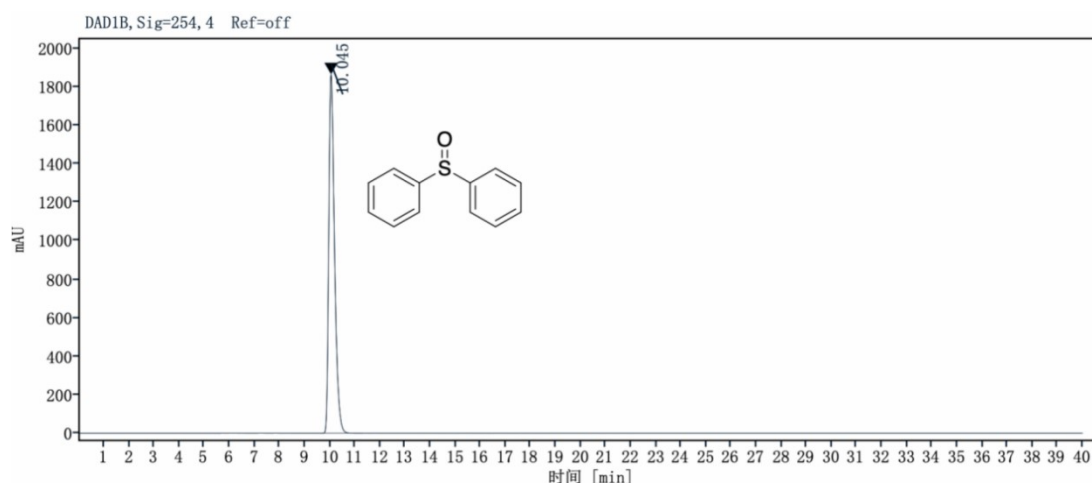

**Figure S18.** Representative chiral HPLC chromatogram of **1o**.

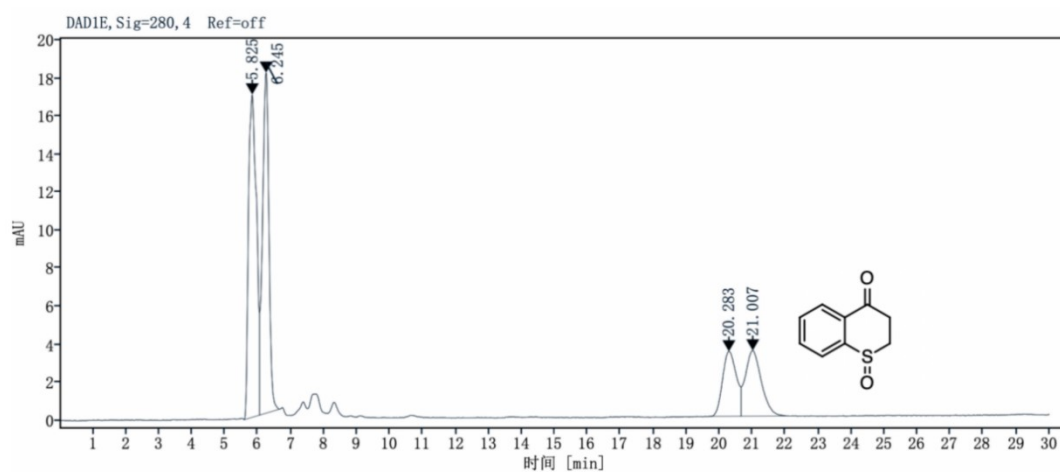

**Figure S19.** Representative chiral HPLC chromatogram of **1p**.

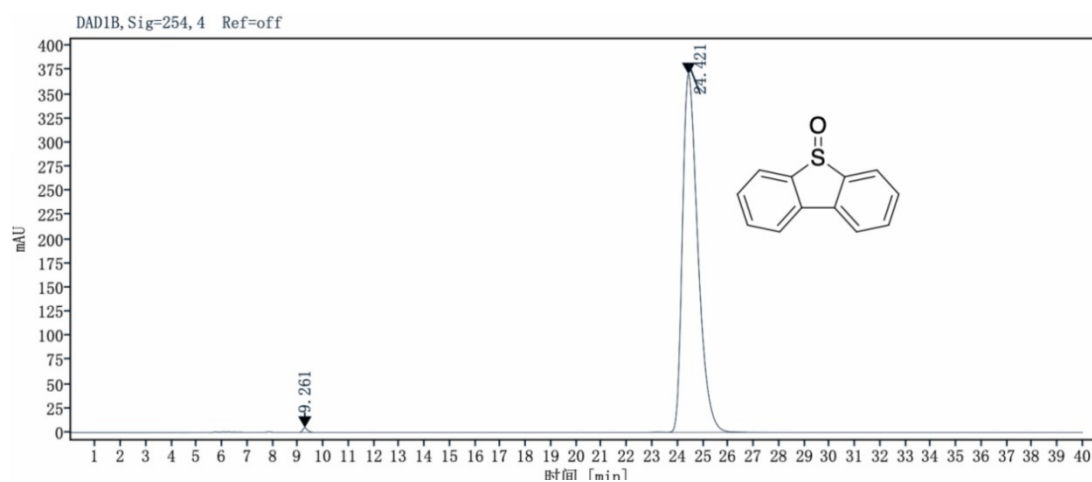

**Figure S20.** Representative chiral HPLC chromatogram of **1q**.

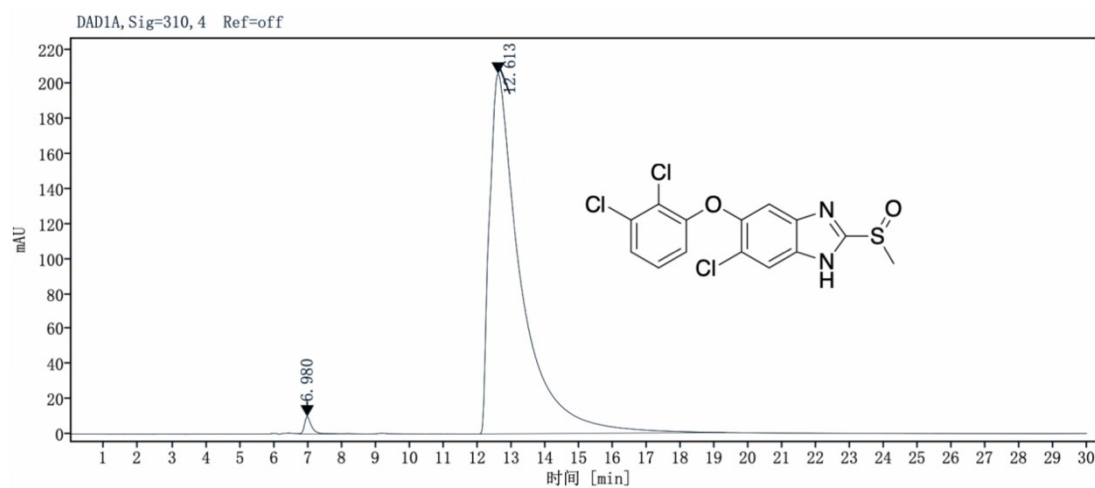

**Figure S21.** Representative chiral HPLC chromatogram of **2a**

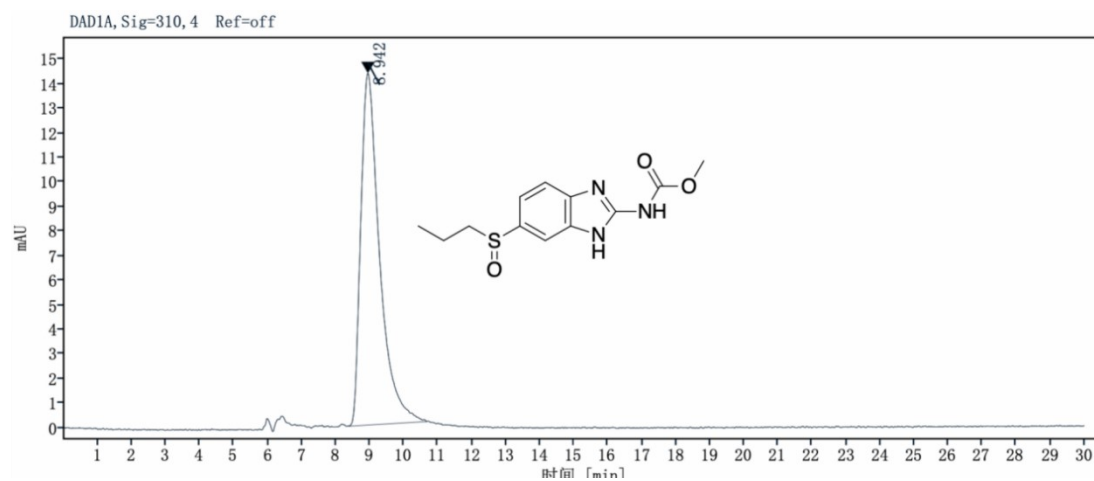

**Figure S22.** Representative chiral HPLC chromatogram of **2b**.

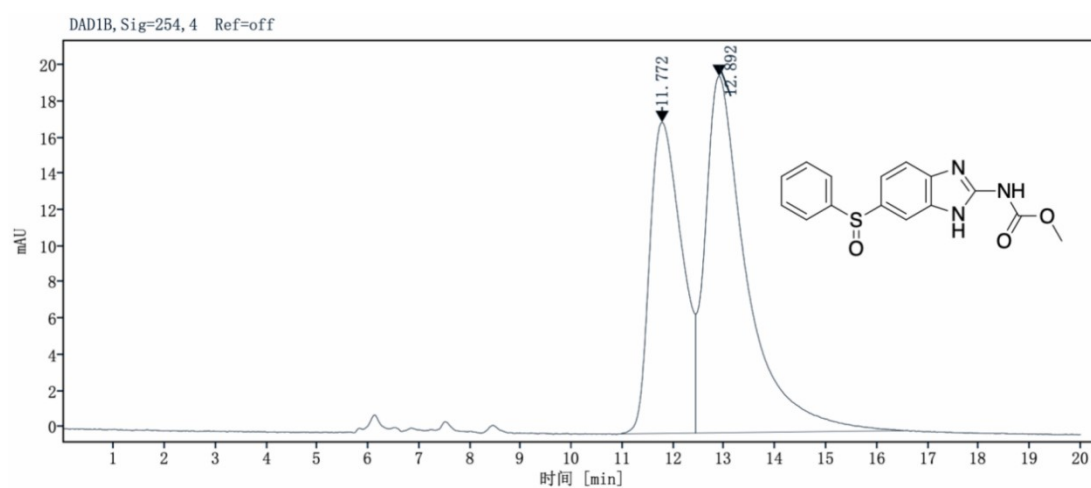

**Figure S23.** Representative chiral HPLC chromatogram of **2c**.

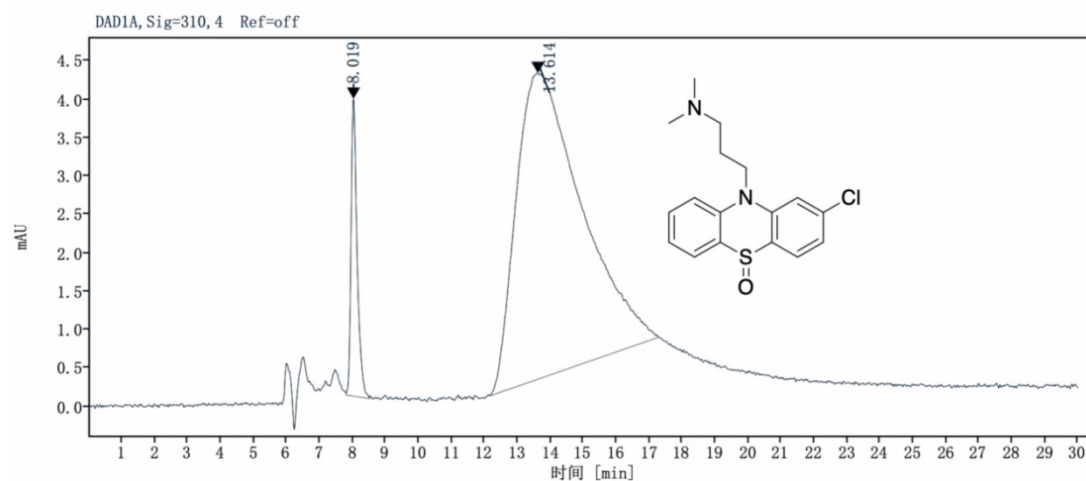

**Figure S24.** Representative chiral HPLC chromatogram of **2d**.

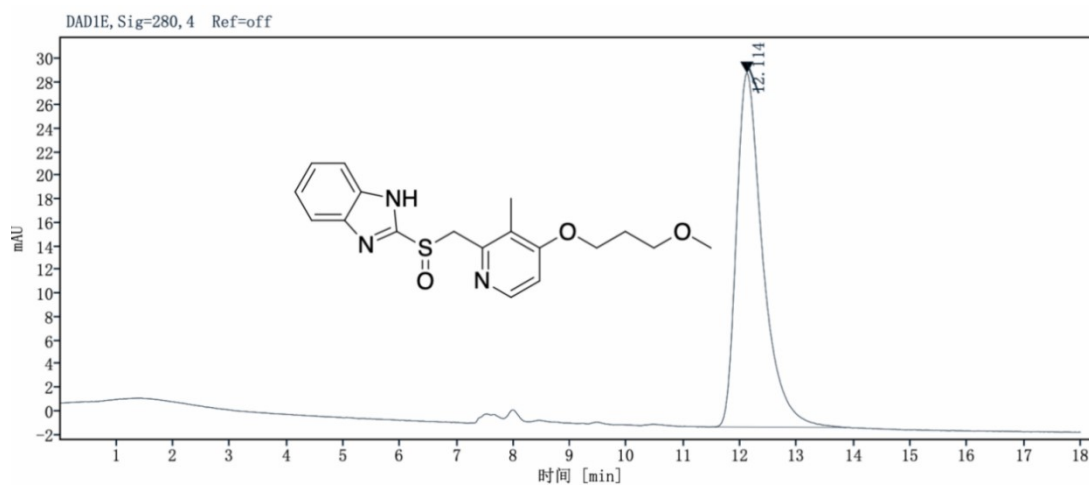

**Figure S25.** Representative chiral HPLC chromatogram of **2e**.

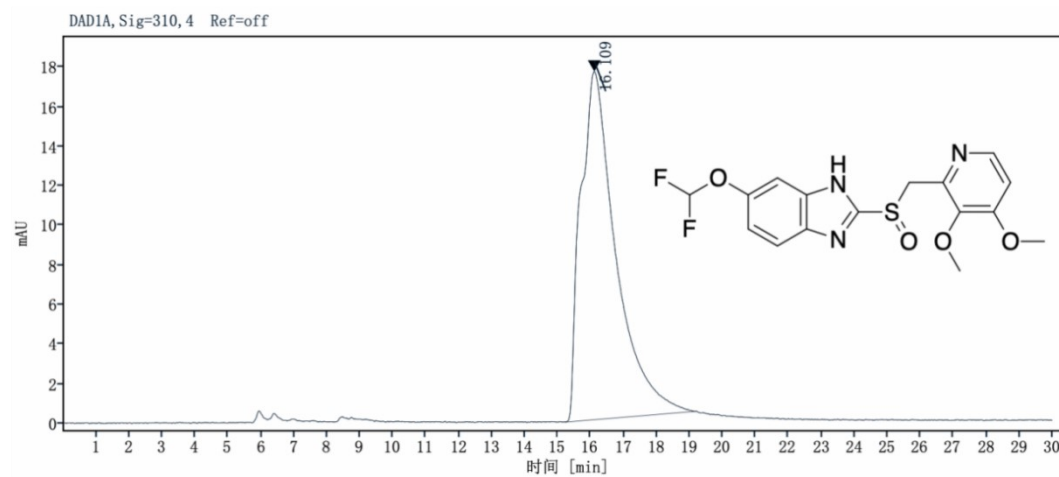

**Figure S26.** Representative chiral HPLC chromatogram of **2f**.

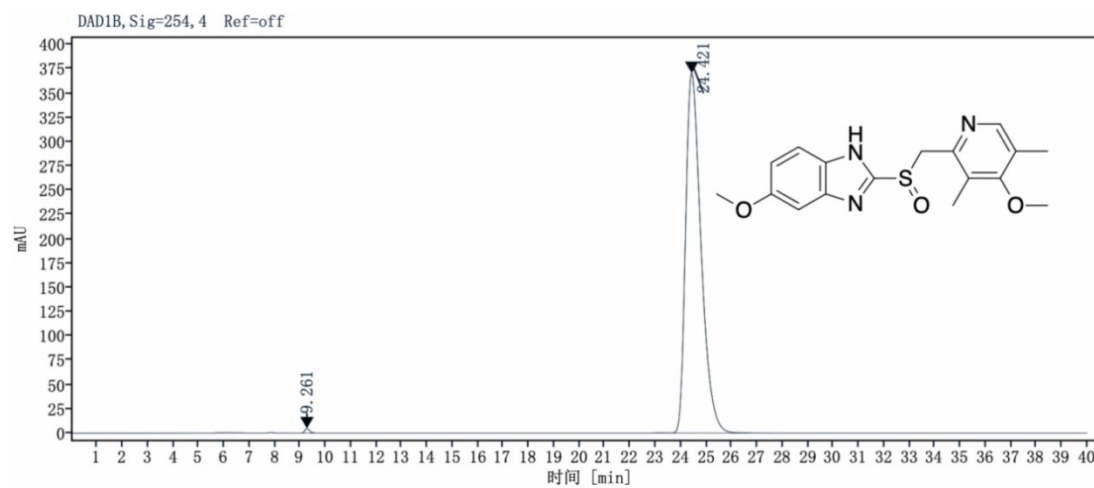

**Figure S27.** Representative chiral HPLC chromatogram of **2g**.
